# Supplementary material
Source: PubMed Central journal article supplement (PMC7229732)
Supplement: mmc1.pdf [file mmc1.pdf]

# Medical student concerns relating to neurosurgery during COVID-19

---

Start of Block: Default Question Block

Intro. Hello and thank you for participating in this brief survey! The survey is intended to gauge how medical students interested in neurosurgery are being impacted by COVID-19. All responses will remain confidential.

---

Q35 Please provide your email.

---

Q1 Which medical school do you currently attend?

▼ Albany Medical College (1) ... Other (not listed) (165)

---

Q2 What is your year of medical training?

- M1 (1)
  - M2 (2)
  - M3 (3)
  - M4 (4)
  - PGY-1 (5)
  - Other (Ex: PhD, research year) (6)
-

Q10 How interested are you in pursuing neurosurgery as a specialty (0 = Tangential interest, 100 = Firm commitment)?

0 10 20 30 40 50 60 70 80 90 100

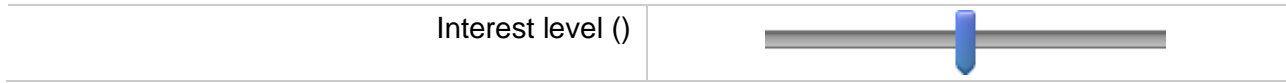

-----

Q3 What aspects of YOUR neurosurgery application cycle do you feel will be most affected by the COVID-19 pandemic? (Select all that apply.)

- Boards exams (eg. STEP1, STEP2) (1)
  - Clinical experience (2)
  - Surgical skills acquisition (3)
  - Clinical grades (4)
  - Laboratory/translational research experience (5)
  - Clinical research experience (6)
  - Neurosurgery academic education (7)
  - Conferences/networking opportunities (8)
  - Sub-internships (9)
  - Letters of recommendation (10)
  - Residency application/interview trail (11)
  - Financial concerns (12)
  - Other (13) \_\_\_\_\_
-

Q4 How have your clinical experiences relating to neurosurgery been impacted by the COVID-19 pandemic? (Select all that apply.)

- Postponed/shortened home neurosurgery elective (or subinternship) (4)
- Postponed/shortened away neurosurgery subinternship (5)
- Postponed/shortened neurology clerkship (1)
- Postponed/shortened surgery clerkship (2)
- Scheduled neurosurgery shadowing days cancelled (3)
- Cancelled neurosurgical conferences (6)
- Other (7) \_\_\_\_\_

*Display This Question:*

*If How have your clinical experiences relating to neurosurgery been impacted by the COVID-19 pandemic... = Postponed/shortened home neurosurgery elective (or subinternship)*

*Or How have your clinical experiences relating to neurosurgery been impacted by the COVID-19 pandemic... = Postponed/shortened away neurosurgery subinternship*

Q5 At which institution(s)?

\_\_\_\_\_

Q21 How have your ongoing research projects been affected by policies regarding COVID-19?

|  |                     |                        |                               |                        |                             |
|--|---------------------|------------------------|-------------------------------|------------------------|-----------------------------|
|  | Not Involved<br>(1) | Faster<br>Progress (2) | No Significant<br>Changes (3) | Slower<br>Progress (4) | Cancelled or<br>Stopped (5) |
|--|---------------------|------------------------|-------------------------------|------------------------|-----------------------------|

Basic science  
or  
translational  
research (1)

Clinical  
research (2)

---

Q11 In what ways have you attempted to stay productive during this time? (Select all that apply.)

Continuing chart review clinical research projects (1)

Working on systematic reviews/meta-analyses (2)

Studying (for board examinations, neurosurgery electives, pre-clinical curriculum, clerkships, etc.) (3)

Volunteering in COVID-19 related activities (i.e. PPE donation programs, fundraisers, etc.) (4)

Pursuing virtual clinical electives related to COVID-19 patient care (5)

Redeployment to COVID-19 patient care in the ER/ICU/Telehealth (6)

Other (7) \_\_\_\_\_

---

Q28 How likely were you to take a year off of medical school BEFORE the changes due to COVID-19? (0 = Not taking a year off, 100 = Certainly taking a year off)

0 10 20 30 40 50 60 70 80 90 100

( )

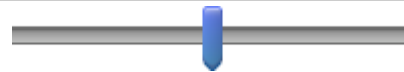

Q29 How likely are you to take a year off of medical school AFTER the changes due to COVID-19? (0 = Not taking a year off, 100 = Certainly taking a year off)

0 10 20 30 40 50 60 70 80 90 100

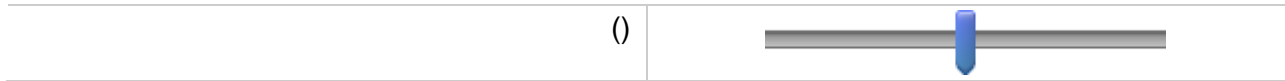

Q9 What additional ways, if any, do you believe the COVID-19 pandemic has changed your neurosurgery application process?

---

---

---

---

---

Q8 In what ways do you believe neurosurgical organizations (AANS, CNS, etc.) can help students/trainees continue to develop during this time?

- Neurosurgery education webinars from faculty/experts in the field (1)
- Virtual research symposia (2)
- Pairing students with virtual neurosurgery mentors (3)
- Virtual surgical skills workshops (4)
- Other (5) \_\_\_\_\_

Q11 What aspects of the practice of neurosurgery are important/interesting for you? (Select all that apply.)

- Surgical aspects of the field (1)
  - Innovative and new technology (2)
  - Interest in the neurosciences (3)
  - Research opportunities (4)
  - Intellectually stimulating work (5)
  - Impact on patients (6)
  - Prestige (7)
  - Financial compensation (8)
  - Other (9) \_\_\_\_\_
-

Q12 Which aspects regarding the field of neurosurgery concern you? (Select all that apply.)

- Work-life balance (1)
  - Competitiveness (2)
  - Personalities in the field (3)
  - Lack of diversity (4)
  - Difficulty of clinical/surgical responsibilities (5)
  - High publication rate (6)
  - Other (7) \_\_\_\_\_
- 

Q13 How has your medical school made curricular changes in response to the COVID-19 pandemic?

- No changes have been made (1)
  - Classroom activities have continued, patient contact activities stopped/moved to remote (2)
  - Patient contact activities have continued, classroom activities stopped/moved to remote (3)
  - All curricular activities have been stopped/moved to remote (4)
  - Other (5) \_\_\_\_\_
- 

Q14 When did your medical school make its first change to the curriculum in response to the COVID-19 pandemic? (Please provide the exact date if possible.)

\_\_\_\_\_

---



Q31 Which type of academic medical degree are you pursuing?

- MD (1)
  - MD/PhD (2)
  - DO (3)
- 

Q30 To which gender do you most identify?

- Female (1)
  - Male (2)
  - Gender non-binary (3)
  - Not listed (4) \_\_\_\_\_
  - Prefer not to answer (5)
-

Q32 To which race do you identify? (Select all that apply.)

- American Indian or Alaska Native (1)
  - Asian (2)
  - Black or African American (3)
  - Native Hawaiian or Other Pacific Islander (4)
  - White (5)
  - Not listed (6) \_\_\_\_\_
  - Prefer not to answer (7)
- 

Q33 Please provide your ethnicity.

- Hispanic or Latino (1)
- Not Hispanic or Latino (2)
- Prefer not to answer (3)

End of Block: Default Question Block

---
